# Supplementary material for: Age and Species of Eucalyptus Plantations Affect Soil Microbial Biomass and Enzymatic Activities
Source: MDPI journal article supplement (doi:10.3390/microorganisms8060811), 2020-05-28
Supplement: s1 [file s1]

Supplementary file:

Table S1. Soil properties in Eucalyptus plantations with different ages and species

|            | 1-year       |              |               | 5 <sup>+</sup> -year |              |              |
|------------|--------------|--------------|---------------|----------------------|--------------|--------------|
|            | EUG          | EC           | EP            | EUG                  | EC           | EP           |
| pH         | 4.64 ± 0.10  | 4.43 ± 0.12  | 4.62 ± 0.17   | 4.68 ± 0.06          | 5.31 ± 0.13  | 4.37 ± 0.10  |
| SWC (%)    | 26.31 ± 1.11 | 18.84 ± 1.99 | 22.47 ± 2.76  | 21.43 ± 3.51         | 19.79 ± 6.79 | 22.69 ± 5.78 |
| TN (g/kg)  | 1.73 ± 0.47  | 2.17 ± 0.57  | 0.80 ± 0.23   | 1.56 ± 0.99          | 1.12 ± 0.34  | 2.66 ± 0.39  |
| SOC (g/kg) | 29.63 ± 5.14 | 30.82 ± 5.22 | 31.96 ± 5.12  | 40.65 ± 4.34         | 38.44 ± 3.30 | 34.68 ± 4.48 |
| C:N ratio  | 18.76 ± 6.68 | 15.20 ± 4.84 | 43.46 ± 14.19 | 33.35 ± 12.39        | 36.95 ± 9.91 | 13.15 ± 1.88 |

Abbreviations: SWC: Soil Water Content, TN: Total Nitrogen, SOC: Soil Organic Carbon, C:N ratio: Carbon to Nitrogen ratio, EUG: *E. urophylla*×*E. grandis*, EC: *E. camaldulens*, EP: *E. pellita*.

**Table S2.** Pearson's correlation coefficients among soil water content (SWC), total nitrogen (TN), soil organic carbon (SOC), C:N ratio (carbon to nitrogen ratio), fungal biomass (FB), bacterial biomass (BB), F:B ration, total microbial biomass (TB) and enzyme activities in Eucalyptus plantations with different ages and species (N=54)

|                | SWC     | PH      | SOC     | TN      | C : N<br>Ratio | FB      | BB      | F:B<br>Ratio | TB      | XYL     | GLR     | CEL     | GLS     | NAG     | PHO    | SUL |
|----------------|---------|---------|---------|---------|----------------|---------|---------|--------------|---------|---------|---------|---------|---------|---------|--------|-----|
| FB             | -0.25   | 0.731** | 0.594** | -0.133  | 0.131          | 1       |         |              |         |         |         |         |         |         |        |     |
| BB             | 0.144   | -0.304  | 0.155   | 0.534** | -0.484**       | 0.269   | 1       |              |         |         |         |         |         |         |        |     |
| F : B<br>Ratio | -0.168  | 0.780** | 0.479** | -0.353* | 0.264          | 0.906** | 0.061   | 1            |         |         |         |         |         |         |        |     |
| TB             | -0.108  | 0.420** | 0.059   | -0.07   | -0.045         | 0.638** | 0.013   | 0.583**      | 1       |         |         |         |         |         |        |     |
| XYL            | 0.179   | -0.127  | -0.124  | 0.166   | -0.305*        | -0.034  | -0.094  | 0.01         | 0.035   | 1       |         |         |         |         |        |     |
| GLR            | -0.306* | 0.191   | 0.055   | -0.004  | -0.017         | 0.391** | 0.196   | 0.468**      | 0.317*  | 0.198   | 1       |         |         |         |        |     |
| CEL            | -0.118  | -0.123  | -0.105  | 0.094   | -0.238         | 0.086   | 0.177   | 0.092        | 0.256   | 0.514** | 0.398** | 1       |         |         |        |     |
| GLS            | -0.077  | 0.105   | -0.024  | -0.145  | 0              | 0.357*  | 0.071   | 0.495**      | 0.424** | 0.350*  | 0.559** | 0.558** | 1       |         |        |     |
| NAG            | -0.066  | 0.256   | 0.106   | -0.066  | -0.044         | 0.464** | 0.186   | 0.477**      | 0.505** | 0.399** | 0.517** | 0.471** | 0.740** | 1       |        |     |
| PHO            | 0.067   | -0.009  | -0.063  | -0.063  | -0.063         | 0.101   | 0.133   | 0.331*       | 0.366*  | 0.203   | 0.199   | 0.194   | 0.615** | 0.711** | 1      |     |
| SUL            | -0.086  | -0.263  | 0.225   | 0.468** | -0.314*        | 0.08    | 0.523** | -0.052       | -0.006  | -0.196  | 0.207   | -0.134  | -0.124  | -0.021  | -0.021 | 1   |

Abbreviations: XYL ( $\beta$ - Xylosidase), GLR ( $\beta$ -D-glucuronidase), CEL ( $\beta$ -Cellobiosidase), GLS ( $\beta$ -Glucosidase), NAG (N-Acetyl-glucosamidase), PHO (Phosphatase), SUL (Sulfatase).

\*means  $P < 0.05$  and \*\* means  $P < 0.01$
